# Supplementary material for: Surface basicity controls C–C coupling rates during carbon dioxide-assisted methane coupling over bifunctional Ca/ZnO catalysts
Source: Royal Society of Chemistry journal article supplement (doi:10.1039/d3cp00332a), 2023-01-01
Supplement: d3cp00332a1.pdf [file d3cp00332a1.pdf]

## Supplemental Information

# Surface basicity controls C-C coupling rates during carbon dioxide-assisted oxidative coupling of methane over bifunctional Ca/ZnO catalysts

Leah R. Filardi<sup>a</sup>, Feipeng Yang<sup>b</sup>, Jinghua Guo<sup>b</sup>, Coleman X. Kronawitter<sup>\*a</sup>, Ron C. Runnebaum<sup>\*a,c</sup>

<sup>a</sup>Department of Chemical Engineering, University of California, Davis, CA, 95616 USA  
Emails: ckrona@ucdavis.edu, rcrunnebaum@ucdavis.edu

<sup>b</sup>Advanced Light Source, Lawrence Berkeley National Laboratory, Berkeley, CA 94720

<sup>c</sup>Department of Viticulture & Enology, University of California, Davis, CA, 95616 USA

### Table of Contents

|                                                                           |    |
|---------------------------------------------------------------------------|----|
| Table S1. Summary of catalytic performance.....                           | 1  |
| Table S2. BET surface area and Ca content quantified by ICP and XPS ..... | 2  |
| Figure S1. SEM images .....                                               | 3  |
| Figure S2. Magnified 2% Ca/ZnO XRD .....                                  | 4  |
| Figure S3. STEM image of 0.6% Ca/ZnO .....                                | 5  |
| Figure S4. XPS results .....                                              | 6  |
| Figure S5. Zn L-edge XANES .....                                          | 7  |
| Figure S6. XPS Ar <sup>+</sup> etching results .....                      | 8  |
| Figure S7. C <sub>2</sub> product yield normalized by Ca content .....    | 9  |
| Figure S8. IR-TPD of pure ZnO .....                                       | 10 |
| Figure S9. Integrated IR-TPD results as a function of temperature .....   | 11 |
| Figure S10. IR-TPD with CO <sub>2</sub> flow .....                        | 12 |

**Table S1.** Summary of catalytic performance

| Sample      | CH <sub>4</sub> Conversion (%) | CO <sub>2</sub> Conversion (%) | C <sub>2</sub> H <sub>6</sub> Yield (mmol/h) | C <sub>2</sub> H <sub>4</sub> Yield (mmol/h) | CO Yield (mmol/h) |
|-------------|--------------------------------|--------------------------------|----------------------------------------------|----------------------------------------------|-------------------|
| ZnO         | 6.7                            | 7.3                            | 0.01                                         | 0.005                                        | 0.60              |
| 0.4% Ca/ZnO | 4.6                            | 4.8                            | 0.02                                         | 0.01                                         | 0.38              |
| 0.6% Ca/ZnO | 2.9                            | 1.9                            | 0.05                                         | 0.03                                         | 0.11              |
| 2% Ca/ZnO   | 2.3                            | 1.3                            | 0.05                                         | 0.03                                         | 0.07              |
| 35% Ca/ZnO  | 1.7                            | 0.9                            | 0.04                                         | 0.02                                         | 0.05              |
| 45% Ca/ZnO  | 1.4                            | 0.7                            | 0.04                                         | 0.01                                         | 0.04              |
| CaO         | 0.6                            | 0.5                            | 0.006                                        | 0.006                                        | 0.04              |

Reaction conditions: 850 °C; 100 mg catalyst; 13.3 mL/min total gas flow rate with  $P_{\text{CH}_4} = 0.25$  atm,  $P_{\text{CO}_2} = 0.5$  atm,  $P_{\text{N}_2} = 0.25$  atm; 4 h on stream. All Ca loadings are reported in molar concentration of metal cations, as determined by ICP-MS (Table S2).

**Table S2.** Summary of physical properties of pure and binary metal oxides.

| Sample      | BET Surface Area <sup>[a]</sup> (m <sup>2</sup> /g) | Ca Loading <sup>[b]</sup> (%) | Ca Surface Concentration <sup>[c]</sup> (%) |
|-------------|-----------------------------------------------------|-------------------------------|---------------------------------------------|
| ZnO         | 2.7075 ± 0.0127                                     |                               |                                             |
| 0.4% Ca/ZnO | 3.7840 ± 0.0193                                     | 0.41                          | 6.9                                         |
| 0.6% Ca/ZnO | 5.4405 ± 0.0418                                     | 0.62                          | 12.1                                        |
| 2% Ca/ZnO   | 7.2562 ± 0.1101                                     | 2.04                          | 10.2                                        |
| 35% Ca/ZnO  | 3.0918 ± 0.0095                                     | 34.94                         | 62.1                                        |
| 45% Ca/ZnO  | 7.0391 ± 0.0375                                     | 44.55                         | 71.8                                        |
| CaO         | 39.6071 ± 0.0125                                    |                               |                                             |

<sup>a</sup>Determined by N<sub>2</sub> physisorption. <sup>b</sup>Determined by ICP-MS. <sup>c</sup>Determined by XPS

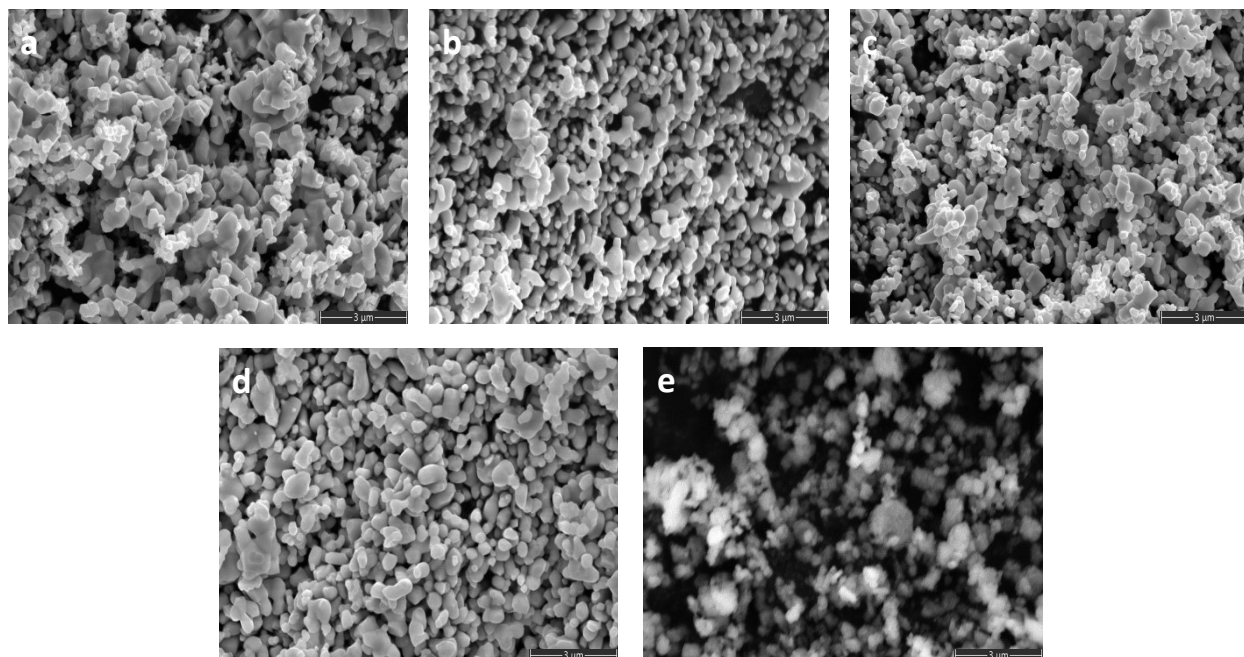

**Figure S1.** SEM images of calcined (a) ZnO, (b) 0.4% Ca/ZnO, (c) 0.6% Ca/ZnO, (d) 2% Ca/ZnO, (e) CaO.

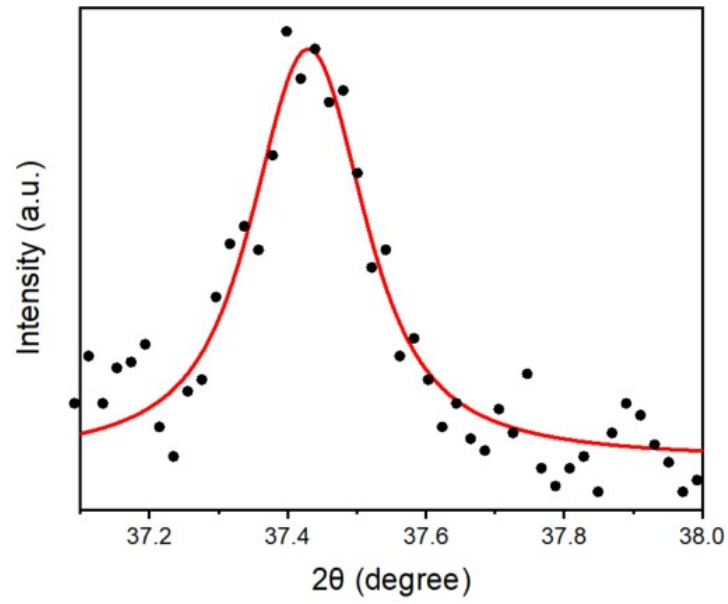

**Figure S2.** Magnification of CaO (200) peak in X-ray diffractogram characterizing the 2% Ca/ZnO sample.

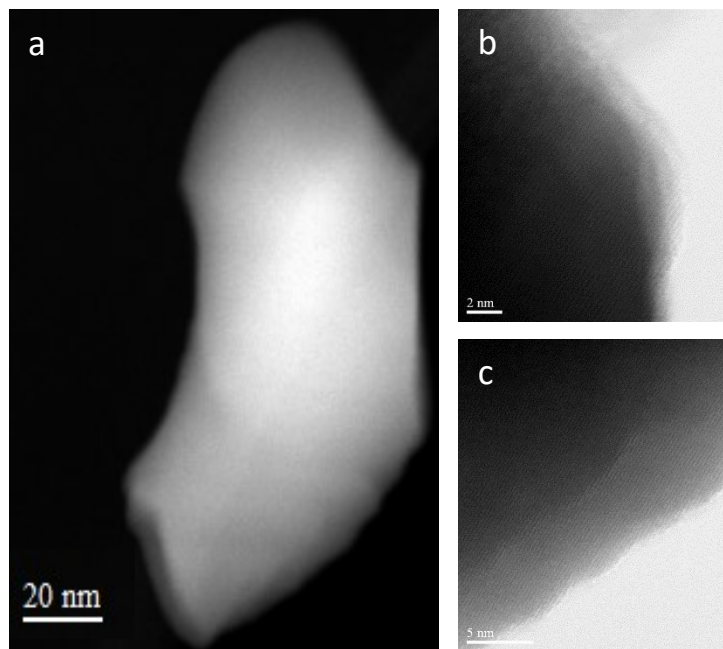

**Figure S3.** HAADF-STEM images of (a) a representative particle of 0.6% Ca/ZnO and (b-c) magnification of ZnO lattice fringes.

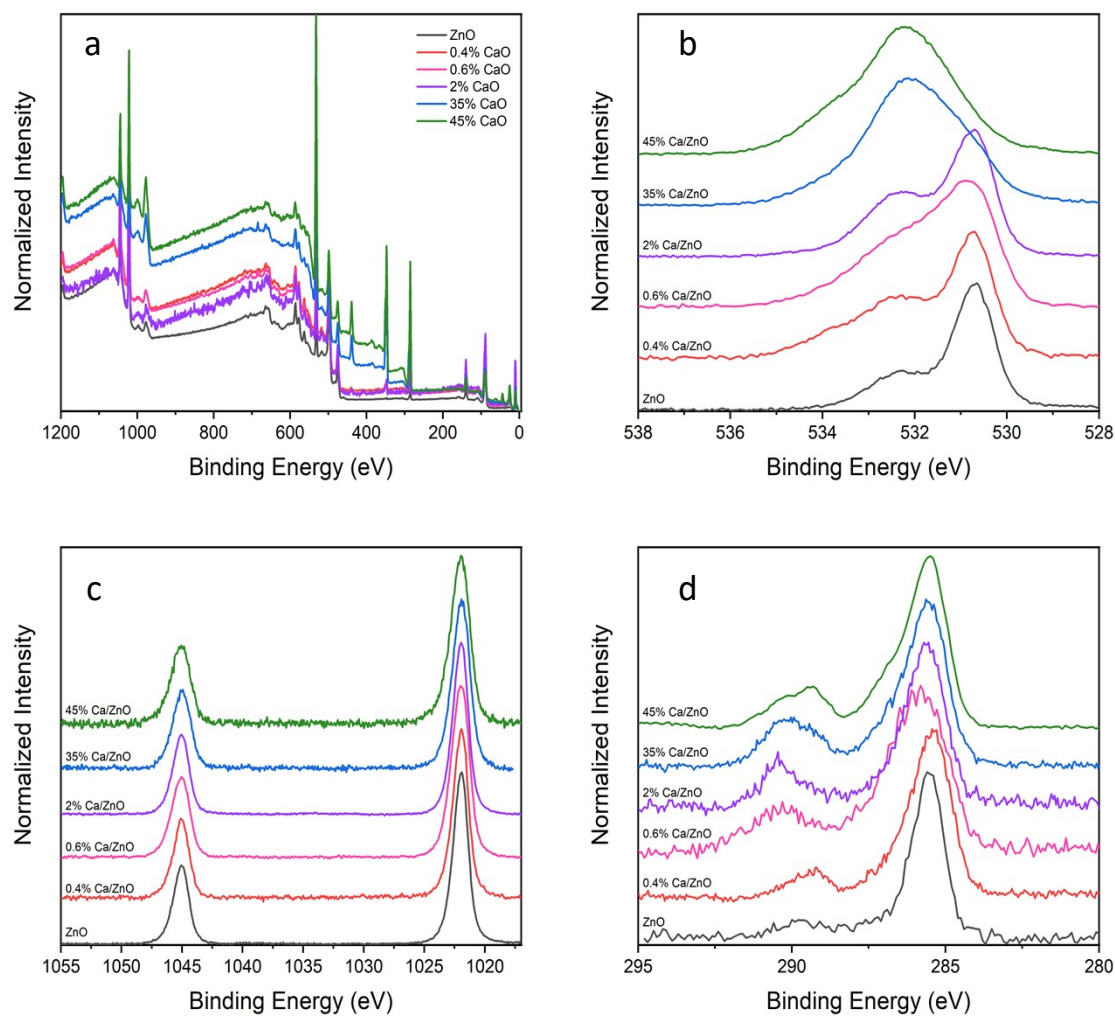

**Figure S4.** XPS spectra: (a) survey scan, and (b) O 1s, (c) Zn 2p, and (d) C 1s regions.

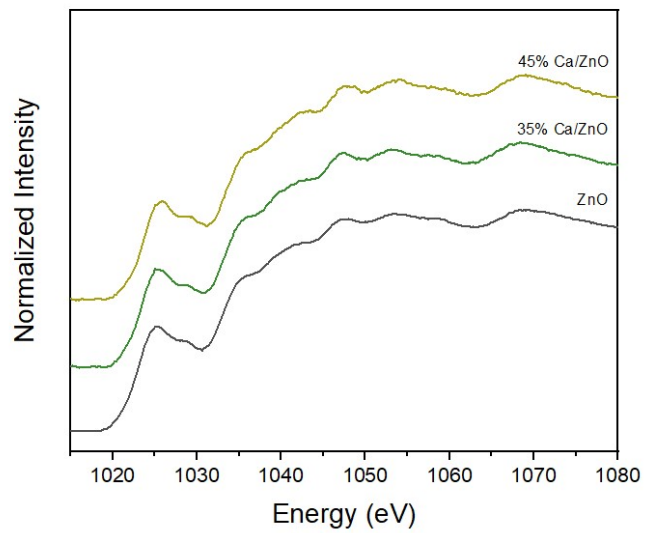

**Figure S5.** XANES spectra of Zn L<sub>23</sub> region: high Ca loading samples compared to pure ZnO.



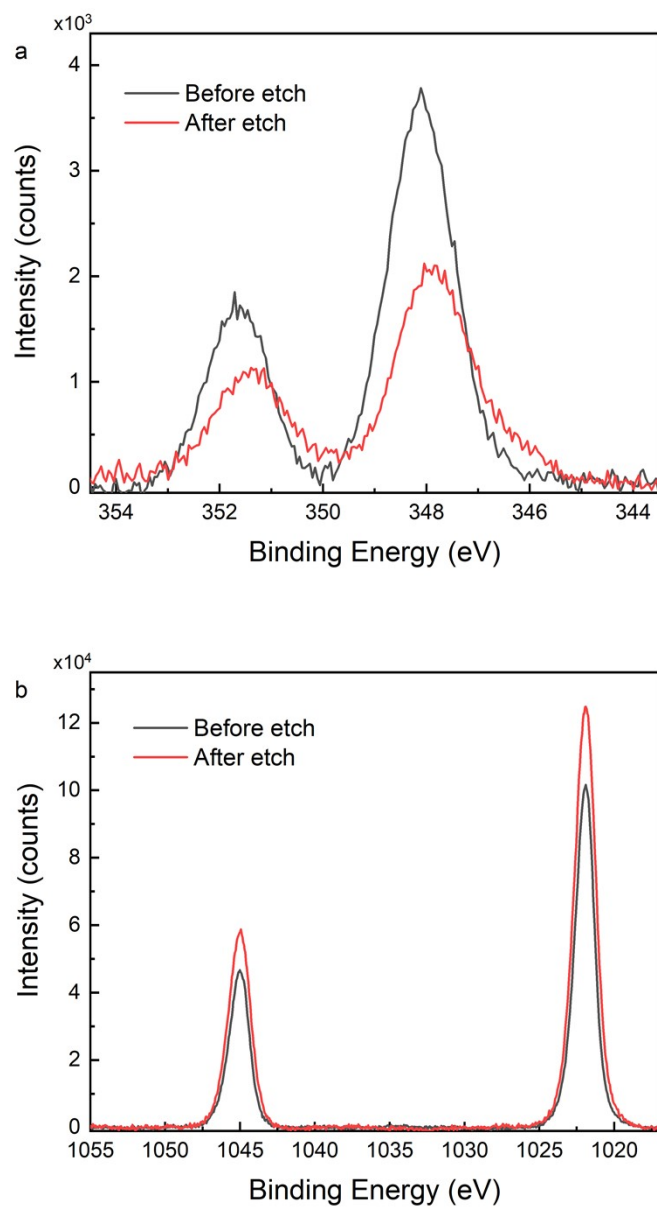

**Figure S6.** XPS scans of (a) Ca 2p and (b) Zn 2p regions characterizing 2% Ca/ZnO before and after an argon etch of the surface.

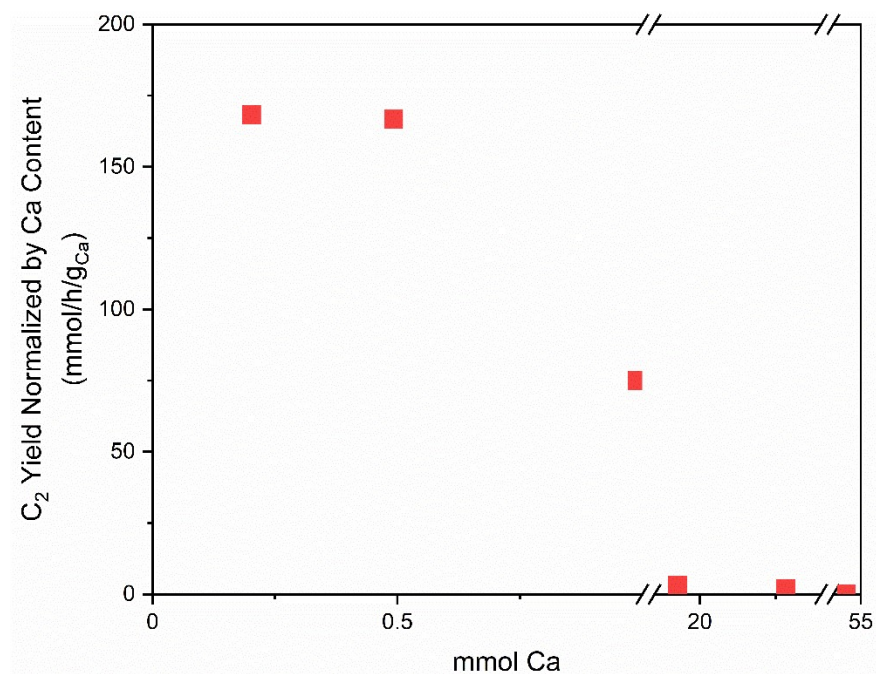

**Figure S7.** Methane coupling activity per calcium site demonstrates effectiveness of each calcium atom for different calcium loadings.

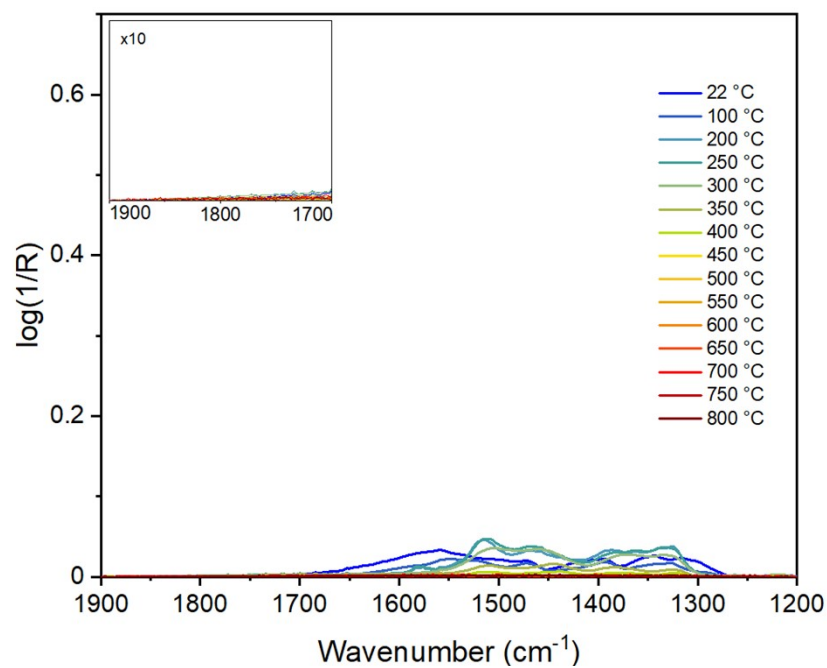

**Figure S8.** DRIFTS temperature programmed desorption of carbonate on ZnO in nitrogen ramping 1 °C/min. Spectra have been subtracted from sample at corresponding temperature prior to carbonate adsorption. Data are shown with the same axis scales as in main text Figure 4, for comparison.

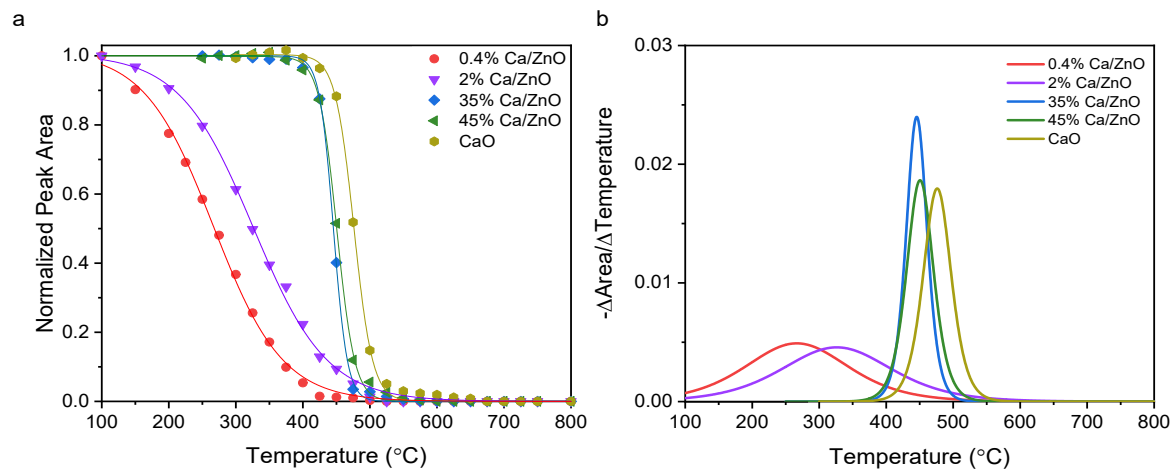

**Figure S9.** (a) DRIFTS-TPD profiles of integrated carbonate region and sigmoidal fit, (b) derivative of sigmoidal fits.

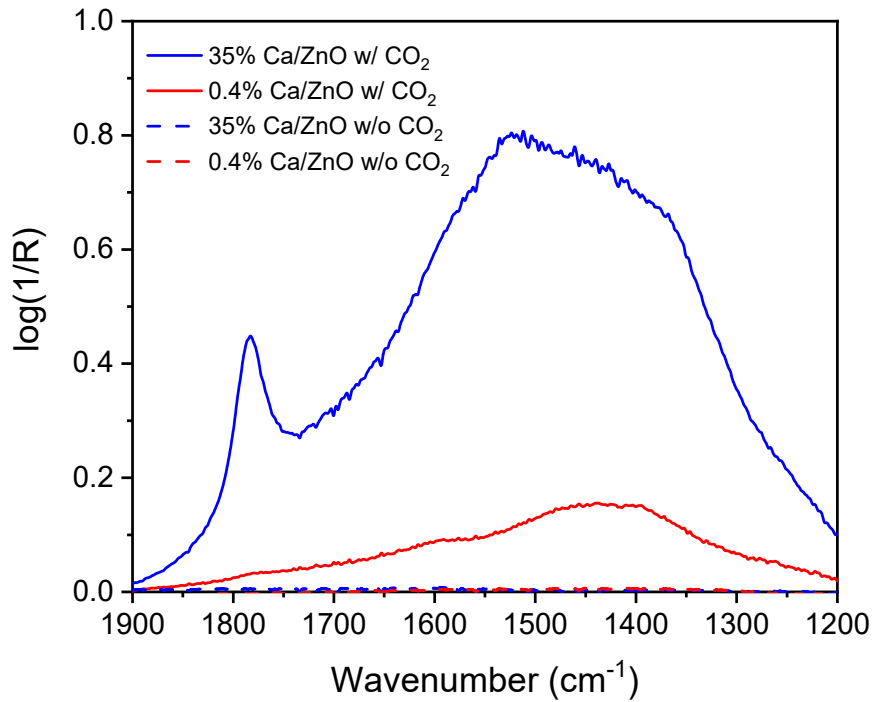

**Figure S10.** DRIFTS spectra characterizing the carbonate region at 850 °C in the absence and presence of 10% CO<sub>2</sub> during the temperature ramp.
